# Supplementary material for: Multi-Omics Analysis Reveals Mechanisms of Strong Phosphorus Adaptation in Tea Plant Roots
Source: MDPI journal article supplement (doi:10.3390/ijms241512431), 2023-08-04

**Table S1.** Differentially changed P-contained metabolites affected by P treatments through metabolomics. The red number indicates the accumulation of compound was increased by 250P, while the green number shows that was decreased.

| NO.    | Compounds              | Formula                | Ionization model   | Molecular weight (Da) | P      | VIP  | Peak area $\times 10^3$ (Means $\pm$ Standard error) |                       | Log <sub>2</sub> (250P /0P) |
|--------|------------------------|------------------------|--------------------|-----------------------|--------|------|------------------------------------------------------|-----------------------|-----------------------------|
|        |                        |                        |                    |                       |        |      | 0P                                                   | 250P                  |                             |
| Lipids |                        |                        |                    |                       |        |      |                                                      |                       |                             |
| L1     | LysoPC 18:4            | C26H46NO7P             | [M+H] <sup>+</sup> | 515.30                | 0.00   | 1.34 | 0.01 $\pm$ 0.00                                      | 121.73 $\pm$ 5.23     | 13.72                       |
| L2     | LysoPE 18:4            | C23H40NO7P             | [M+H] <sup>+</sup> | 473.25                | 0.00   | 1.34 | 0.01 $\pm$ 0.00                                      | 15.49 $\pm$ 0.75      | 10.75                       |
| L3     | LysoPE 20:5            | C25H42NO7P             | [M+H] <sup>+</sup> | 499.27                | 0.01   | 1.34 | 0.01 $\pm$ 0.00                                      | 14.94 $\pm$ 1.57      | 10.70                       |
| L4     | LysoPE 16:3            | C21H38NO7P             | [M+H] <sup>+</sup> | 447.24                | 0.01   | 1.34 | 0.01 $\pm$ 0.00                                      | 3.74 $\pm$ 0.33       | 8.70                        |
| L5     | LysoPC 17:0            | C25H52NO7P             | [M+H] <sup>+</sup> | 509.35                | 0.00   | 1.32 | 123.46 $\pm$ 29.16                                   | 3895.07 $\pm$ 68.44   | 4.98                        |
| L6     | LysoPC 17:0(2n isomer) | C25H52NO7P             | [M+H] <sup>+</sup> | 509.35                | 0.00   | 1.32 | 123.46 $\pm$ 29.16                                   | 3895.07 $\pm$ 68.44   | 4.98                        |
| L7     |                        | LysoPE 16:0            | C21H44NO7P         | [M+H] <sup>+</sup>    | 453.29 | 0.00 | 1.34                                                 | 436.55 $\pm$ 9.23     | 11623.33 $\pm$ 472.23       |
| L8     | LysoPC 18:0(2n isomer) | C26H54NO7P             | [M+H] <sup>+</sup> | 523.36                | 0.01   | 1.32 | 304.19 $\pm$ 68.10                                   | 6585.43 $\pm$ 611.04  | 4.44                        |
| L9     |                        | LysoPE 18:0            | C23H48NO7P         | [M+H] <sup>+</sup>    | 481.32 | 0.00 | 1.34                                                 | 11.56 $\pm$ 0.33      | 246.90 $\pm$ 7.79           |
| L10    | LysoPC 16:0            | C24H50NO7P             | [M+H] <sup>+</sup> | 495.33                | 0.00   | 1.34 | 4602.47 $\pm$ 99.71                                  | 85037.67 $\pm$ 1359   | 4.21                        |
| L11    | LysoPC 20:5            | C28H48NO7P             | [M+H] <sup>+</sup> | 541.32                | 0.00   | 1.34 | 10.15 $\pm$ 0.30                                     | 172.19 $\pm$ 7.63     | 4.08                        |
| L12    | LysoPC 16:2            | C24H46NO7P             | [M+H] <sup>+</sup> | 491.30                | 0.02   | 1.07 | 5.33 $\pm$ 5.32                                      | 85.67 $\pm$ 14.71     | 4.01                        |
| L13    | LysoPC 20:2            | C28H54NO7P             | [M+H] <sup>+</sup> | 547.36                | 0.02   | 1.32 | 16.80 $\pm$ 2.60                                     | 202.75 $\pm$ 25.02    | 3.59                        |
| L14    | LysoPC 20:3            | C28H52NO7P             | [M+H] <sup>+</sup> | 545.35                | 0.01   | 1.33 | 76.53 $\pm$ 1.81                                     | 610.46 $\pm$ 49.49    | 3.00                        |
| L15    | Choline alfoscerate    | C8H20NO6P              | [M+H] <sup>+</sup> | 257.10                | 0.01   | 1.33 | 414.74 $\pm$ 17.5                                    | 2847.83 $\pm$ 253.07  | 2.78                        |
| L16    | LysoPE 20:3(2n isomer) | C25H46NO7P             | [M+H] <sup>+</sup> | 503.30                | 0.01   | 1.33 | 5.92 $\pm$ 0.14                                      | 37.53 $\pm$ 3.15      | 2.66                        |
| L17    |                        | LysoPE 20:3            | C25H46NO7P         | [M+H] <sup>+</sup>    | 503.30 | 0.00 | 1.33                                                 | 5.78 $\pm$ 0.20       | 35.45 $\pm$ 1.77            |
| L18    | LysoPC 15:1            | C23H46NO7P             | [M+H] <sup>+</sup> | 479.30                | 0.00   | 1.32 | 39.36 $\pm$ 5.66                                     | 237.56 $\pm$ 7.69     | 2.59                        |
| L19    | LysoPC 16:2(2n isomer) | C24H46NO7P             | [M+H] <sup>+</sup> | 491.30                | 0.00   | 1.34 | 70.53 $\pm$ 0.60                                     | 383.10 $\pm$ 13.41    | 2.44                        |
| L20    |                        | LysoPC 20:1            | C28H56NO7P         | [M+H] <sup>+</sup>    | 549.38 | 0.00 | 1.33                                                 | 85.43 $\pm$ 5.36      | 453.25 $\pm$ 13.55          |
| L21    | LysoPC 20:4            | C28H50NO7P             | [M+H] <sup>+</sup> | 543.33                | 0.00   | 1.33 | 266.97 $\pm$ 9.01                                    | 1380.83 $\pm$ 65.25   | 2.37                        |
| L22    | LysoPE 18:3(2n isomer) | C23H42NO7P             | [M+H] <sup>+</sup> | 475.27                | 0.00   | 1.34 | 4909.70 $\pm$ 125.21                                 | 23514.00 $\pm$ 527.77 | 2.26                        |
| L23    | LysoPE 20:4(2n isomer) | C25H44NO7P             | [M+H] <sup>+</sup> | 501.29                | 0.00   | 1.33 | 32.61 $\pm$ 1.85                                     | 150.40 $\pm$ 5.04     | 2.21                        |
| L24    |                        | LysoPC 16:1            | C24H48NO7P         | [M+H] <sup>+</sup>    | 493.32 | 0.00 | 1.23                                                 | 1429.65 $\pm$ 377.74  | 6103.40 $\pm$ 233.11        |
| L25    | LysoPC 19:1            | C27H54NO7P             | [M+H] <sup>+</sup> | 535.36                | 0.00   | 1.33 | 646.27 $\pm$ 27.79                                   | 2519.43 $\pm$ 52.54   | 1.96                        |
| L26    | LysoPC 22:4            | C30H54NO7P             | [M+H] <sup>+</sup> | 571.36                | 0.02   | 1.32 | 13.27 $\pm$ 0.51                                     | 49.58 $\pm$ 4.85      | 1.90                        |
| L27    | LysoPC 18:3(2n isomer) | C26H48NO7P             | [M+H] <sup>+</sup> | 517.32                | 0.00   | 1.34 | 1805.80 $\pm$ 29.06                                  | 6178.17 $\pm$ 223.6   | 1.77                        |
| L28    |                        | LysoPC 18:3            | C26H48NO7P         | [M+H] <sup>+</sup>    | 517.32 | 0.00 | 1.34                                                 | 1805.80 $\pm$ 29.06   | 6178.17 $\pm$ 223.6         |
| L29    | LysoPC 16:1(2n isomer) | C24H48NO7P             | [M+H] <sup>+</sup> | 493.32                | 0.01   | 1.33 | 1638.70 $\pm$ 33.58                                  | 5516.23 $\pm$ 305.68  | 1.75                        |
| L30    |                        | LysoPC 17:2            | C25H48NO7P         | [M+H] <sup>+</sup>    | 505.32 | 0.00 | 1.33                                                 | 125.10 $\pm$ 7.09     | 377.84 $\pm$ 6.42           |
| L31    | LysoPE 15:0(2n isomer) | C20H42NO7P             | [M+H] <sup>+</sup> | 439.27                | 0.00   | 1.33 | 940.54 $\pm$ 12.65                                   | 2694.37 $\pm$ 88.83   | 1.52                        |
| L32    | LysoPE 16:1(2n isomer) | C21H42NO7P             | [M+H] <sup>+</sup> | 451.27                | 0.00   | 1.31 | 4364.60 $\pm$ 465.98                                 | 12168.00 $\pm$ 189.96 | 1.48                        |
| L33    | LysoPE 18:2(2n isomer) | C23H44NO7P             | [M+H] <sup>+</sup> | 477.29                | 0.00   | 1.34 | 474.33 $\pm$ 4.42                                    | 1297.47 $\pm$ 40.81   | 1.45                        |
| L34    | LysoPC 15:0(2n isomer) | C23H48NO7P             | [M+H] <sup>+</sup> | 481.32                | 0.04   | 1.26 | 116.77 $\pm$ 13.02                                   | 318.80 $\pm$ 45.78    | 1.45                        |
| L35    | LysoPC 20:2(2n isomer) | C28H54NO7P             | [M+H] <sup>+</sup> | 547.36                | 0.00   | 1.34 | 49.73 $\pm$ 0.68                                     | 133.86 $\pm$ 3.61     | 1.43                        |
| L36    | LysoPE 18:0(2n isomer) | C23H48NO7P             | [M+H] <sup>+</sup> | 481.32                | 0.00   | 1.33 | 40.04 $\pm$ 1.96                                     | 106.47 $\pm$ 3.27     | 1.41                        |
| L37    | LysoPE 18:1(2n isomer) | C23H46NO7P             | [M+H] <sup>+</sup> | 479.30                | 0.00   | 1.33 | 5078.43 $\pm$ 126.28                                 | 13195.67 $\pm$ 480.67 | 1.38                        |
| L38    | LysoPC 16:0(2n isomer) | C24H50NO7P             | [M+H] <sup>+</sup> | 495.33                | 0.02   | 1.32 | 968.45 $\pm$ 8.59                                    | 2509.60 $\pm$ 200.54  | 1.37                        |
| L39    |                        | LysoPE 18:1            | C23H46NO7P         | [M+H] <sup>+</sup>    | 479.30 | 0.00 | 1.33                                                 | 4837.00 $\pm$ 110.1   | 12477.67 $\pm$ 457.67       |
| L40    | LysoPE 15:1(2n isomer) | C20H40NO7P             | [M+H] <sup>+</sup> | 437.25                | 0.00   | 1.31 | 25.62 $\pm$ 2.31                                     | 64.27 $\pm$ 1.38      | 1.33                        |
| L41    |                        | LysoPC 22:5            | C30H52NO7P         | [M+H] <sup>+</sup>    | 569.35 | 0.01 | 1.18                                                 | 30.77 $\pm$ 6.38      | 73.23 $\pm$ 4.45            |
| L42    | LysoPC 19:2            | C27H52NO7P             | [M+H] <sup>+</sup> | 533.35                | 0.00   | 1.24 | 36.57 $\pm$ 5.82                                     | 86.78 $\pm$ 6.27      | 1.25                        |
| L43    | LysoPE 16:1            | C21H42NO7P             | [M+H] <sup>+</sup> | 451.27                | 0.00   | 1.33 | 5260.53 $\pm$ 35.20                                  | 12005.33 $\pm$ 333.38 | 1.19                        |
| L44    | LysoPC 15:1            | C20H40NO7P             | [M+H] <sup>+</sup> | 437.25                | 0.00   | 1.34 | 171.09 $\pm$ 3.21                                    | 372.37 $\pm$ 5.52     | 1.12                        |
| L45    | LysoPC 19:2(2n isomer) | C27H52NO7P             | [M+H] <sup>+</sup> | 533.35                | 0.01   | 1.31 | 102.81 $\pm$ 4.29                                    | 212.87 $\pm$ 14.18    | 1.05                        |
| L46    |                        | LysoPC 18:2            | C26H50NO7P         | [M+H] <sup>+</sup>    | 519.33 | 0.00 | 1.33                                                 | 870.71 $\pm$ 3.96     | 1767.77 $\pm$ 50.36         |
| L47    | LysoPC 18:2(2n isomer) | C26H50NO7P             | [M+H] <sup>+</sup> | 519.33                | 0.00   | 1.33 | 870.71 $\pm$ 3.96                                    | 1767.77 $\pm$ 50.36   | 1.02                        |
| L48    |                        | LysoPC 18:1(2n isomer) | C26H52NO7P         | [M+H] <sup>+</sup>    | 521.35 | 0.00 | 1.33                                                 | 6393.00 $\pm$ 56.69   | 12928.00 $\pm$ 283.04       |
| L49    | LysoPE 14:0(2n isomer) | C19H40NO7P             | [M+H] <sup>+</sup> | 425.25                | 0.00   | 1.33 | 85.32 $\pm$ 1.45                                     | 172.12 $\pm$ 5.22     | 1.01                        |
| L50    | LysoPC 16:4            | C24H42NO7P             | [M+H] <sup>+</sup> | 487.27                | 0.00   | 1.34 | 181.62 $\pm$ 1.06                                    | 17.69 $\pm$ 1.14      | -3.36                       |
| L51    | LysoPE 17:1            | C22H44NO7P             | [M+H] <sup>+</sup> | 465.29                | 0.00   | 1.34 | 2037.10 $\pm$ 19.32                                  | 0.01 $\pm$ 0.00       | -17.79                      |

(continued)

| NO.                         | Compounds                                          | Formula       | Ionization model | Molecular weight (Da) | P    | VIP  | Peak area × 10 <sup>3</sup><br>(Means±Standard error) |                | Log <sub>2</sub><br>(250P /0P) |
|-----------------------------|----------------------------------------------------|---------------|------------------|-----------------------|------|------|-------------------------------------------------------|----------------|--------------------------------|
|                             |                                                    |               |                  |                       |      |      | 0P                                                    | 250P           |                                |
| Nucleotides and derivatives |                                                    |               |                  |                       |      |      |                                                       |                |                                |
| ND1                         | Uridine 5'-monophosphate                           | C9H13N2O9P    | [M-H]-           | 324.04                | 0.00 | 1.33 | 21.78±2.34                                            | 183.66±10.02   | 3.08                           |
| ND2                         | 2-Deoxyribose-1-phosphate                          | C5H11O7P      | [M-H]-           | 214.02                | 0.00 | 1.30 | 23.70±4.15                                            | 126.07±6.57    | 2.41                           |
| ND3                         | 5-Aminoimidazole ribonucleotide                    | C8H14N3O7P    | [M+H]+           | 295.06                | 0.01 | 1.33 | 524.10±11.38                                          | 2272.07±204.85 | 2.12                           |
| ND4                         | NADP (Nicotinamide adenine dinucleotide phosphate) | C21H28N7O17P3 | [M-H]-           | 743.08                | 0.02 | 1.31 | 56.28±3.14                                            | 239.59±28.39   | 2.09                           |
| ND5                         | Uridine 5'-diphospho-D-glucose                     | C15H24N2O17P2 | [M-H]-           | 566.06                | 0.01 | 1.33 | 1868.23±13.98                                         | 7739.03±678.67 | 2.05                           |
| ND6                         | Adenosine 5'-monophosphate                         | C10H14N5O7P   | [M+H]+           | 347.06                | 0.00 | 1.31 | 34.91±5.08                                            | 141.97±7.66    | 2.02                           |
| ND7                         | Uridine-5'-diphosphate-D-xylose                    | C14H22N2O16P2 | [M-H]-           | 536.04                | 0.00 | 1.33 | 219.91±4.29                                           | 751.95±29.86   | 1.77                           |
| ND8                         | Uridine 5'-diphosphate                             | C9H14N2O12P2  | [M-H]-           | 404.00                | 0.00 | 1.32 | 10.26±1.02                                            | 33.26±1.33     | 1.70                           |
| ND9                         | Adenosine 5'-diphosphate                           | C10H15N5O10P2 | [M-H]-           | 427.03                | 0.04 | 1.29 | 40.76±2.98                                            | 118.27±15.93   | 1.54                           |
| ND10                        | Uridine 5'-diphospho-N-acetylglucosamine           | C17H27N3O17P2 | [M-H]-           | 607.08                | 0.00 | 1.26 | 102.42±17.62                                          | 264.95±10.39   | 1.37                           |
| ND11                        | Cyclic 3',5'-adenylic acid                         | C10H12N5O6P   | [M-H]-           | 329.05                | 0.00 | 1.07 | 26.51±0.94                                            | 2.09±2.08      | -3.66                          |
| Saccharides and alcohols    |                                                    |               |                  |                       |      |      |                                                       |                |                                |
| SA1                         | Dihydroxyacetone phosphate                         | C3H7O6P       | [M-H]-           | 170.00                | 0.03 | 1.34 | 0.01±0.00                                             | 219.62±37.72   | 14.57                          |
| SA2                         | D-Glucose 1,6-bisphosphate                         | C6H14O12P2    | [M-H]-           | 340.00                | 0.01 | 1.34 | 0.01±0.00                                             | 53.64±6.38     | 12.54                          |
| SA3                         | Sorbitol-6-phosphate                               | C6H15O9P      | [M-H]-           | 262.05                | 0.01 | 1.34 | 0.01±0.00                                             | 49.01±3.7      | 12.41                          |
| SA4                         | D-Glucose 6-phosphate*                             | C6H13O9P      | [M-H]-           | 260.03                | 0.00 | 1.34 | 234.96±9.50                                           | 4601.80±62.26  | 4.29                           |
| SA5                         | Glucose-1-phosphate*                               | C6H13O9P      | [M-H]-           | 260.03                | 0.00 | 1.34 | 206.93±14.74                                          | 3977.64±177.86 | 4.26                           |
| SA6                         | D-Fructose 6-phosphate                             | C6H13O9P      | [M-H]-           | 260.03                | 0.02 | 1.33 | 207.66±14.53                                          | 3058.77±441.14 | 3.88                           |
| SA7                         | Trehalose 6-phosphate                              | C12H23O14P    | [M-H]-           | 422.08                | 0.02 | 1.28 | 22.26±5.30                                            | 118.21±15.06   | 2.41                           |
| SA8                         | D-Glucosamine 1-phosphate                          | C6H14NO8P     | [M-H]-           | 259.05                | 0.00 | 1.33 | 107.85±3.22                                           | 452.75±23.5    | 2.07                           |
| SA9                         | D-Erythrose-4-phosphate                            | C4H9O7P       | [M-H]-           | 200.01                | 0.04 | 1.28 | 289.05±19.14                                          | 822.44±110.19  | 1.51                           |
| SA10                        | Glucarate O-phosphoric acid                        | C6H11PO11     | [M-H]-           | 290.00                | 0.03 | 1.29 | 1365.83±108.78                                        | 3752.70±442.51 | 1.46                           |
| SA11                        | D-Sedoheptuose 7-phosphate                         | C7H15O10P     | [M-H]-           | 290.04                | 0.00 | 1.32 | 1416.87±93.3                                          | 3607.30±148.22 | 1.35                           |
| Organic acids               |                                                    |               |                  |                       |      |      |                                                       |                |                                |
| OA1                         | Phosphoenolpyruvate                                | C3H5O6P       | [M-H]-           | 167.98                | 0.00 | 1.34 | 0.01±0.00                                             | 1303.27±61.40  | 17.14                          |
| OA2                         | 2-Hydroxyethylphosphonic acid                      | C2H7O4P       | [M-H]-           | 126.01                | 0.01 | 1.23 | 62.83±2.51                                            | 26.23±4.77     | -1.26                          |
| Alkaloids                   |                                                    |               |                  |                       |      |      |                                                       |                |                                |
| A1                          | O-Phosphorylethanolamine                           | C2H8NO4P      | [M-H]-           | 141.02                | 0.00 | 1.33 | 11.06±1.81                                            | 206.66±8.38    | 4.22                           |
| Others                      |                                                    |               |                  |                       |      |      |                                                       |                |                                |
| O1                          | Propyl 2-(trimethylammonio)ethyl phosphate         | C28H50NO7P    | [M+H]+           | 543.33                | 0.00 | 1.34 | 374.61±6.28                                           | 1347.67±37.3   | 1.85                           |

**Table S2.** Differentially changed lipid metabolites without P affected by P treatments through metabolomics. The red number indicates the accumulation of compound was increased by 250P, while the green number shows that was decreased.

| Compounds                                            | Formula   | Ionization model | Molecular weight (Da) | P    | VIP  | Peak area $\times 10^3$<br>(Means $\pm$ Standard error) |                       | Log <sub>2</sub><br>(250P /0P) |
|------------------------------------------------------|-----------|------------------|-----------------------|------|------|---------------------------------------------------------|-----------------------|--------------------------------|
|                                                      |           |                  |                       |      |      | 0P                                                      | 250P                  |                                |
| Free fatty acids                                     |           |                  |                       |      |      |                                                         |                       |                                |
| (E)-Linalool-1-oic acid                              | C10H16O3  | [M-H]-           | 184.11                | 0.03 | 1.34 | 0.01 $\pm$ 0.00                                         | 36.81 $\pm$ 6.65      | 12.00                          |
| 1-Linolenoyl-rac-glycerol-diglucoside                | C33H56O14 | [M+H]+           | 676.37                | 0.00 | 1.29 | 142.81 $\pm$ 31.87                                      | 994.91 $\pm$ 24.28    | 2.80                           |
| Arachidonic acid                                     | C20H32O2  | [M-H]-           | 304.24                | 0.01 | 1.31 | 21.39 $\pm$ 3.31                                        | 114.44 $\pm$ 12.10    | 2.42                           |
| 13-Hydroxy-9Z,11E-octadecadienoic acid               | C19H34O3  | [M+H]+           | 310.25                | 0.00 | 1.24 | 2.17 $\pm$ 0.81                                         | 11.15 $\pm$ 0.30      | 2.36                           |
| Cis-10-pentadecenoic acid (C15: 1)                   | C15H28O2  | [M-H]-           | 240.21                | 0.00 | 1.33 | 9060.40 $\pm$ 502.90                                    | 33254.67 $\pm$ 830.92 | 1.88                           |
| Oleic acid                                           | C18H34O2  | [M+H]+           | 282.26                | 0.00 | 1.21 | 2.43 $\pm$ 0.56                                         | 7.66 $\pm$ 0.53       | 1.66                           |
| 1-Linoleoyl-sn-glycerol-diglucoside                  | C33H58O14 | [M+H]+           | 678.38                | 0.00 | 1.33 | 32.67 $\pm$ 0.95                                        | 94.80 $\pm$ 2.23      | 1.54                           |
| 9,12,13-Trihome                                      | C18H34O5  | [M-H]-           | 330.24                | 0.00 | 1.32 | 66.37 $\pm$ 3.62                                        | 149.37 $\pm$ 3.85     | 1.17                           |
| 9,10,13-Trihydroxy-11-octadecenoic acid              | C18H34O5  | [M-H]-           | 330.24                | 0.00 | 1.33 | 48.02 $\pm$ 1.73                                        | 103.57 $\pm$ 2.12     | 1.11                           |
| 13(S)-Hode;13(S)-hydroxyoctadeca-9Z,11E-dienoic acid | C18H32O3  | [M-H]-           | 296.24                | 0.00 | 1.33 | 44.72 $\pm$ 2.10                                        | 91.48 $\pm$ 0.38      | 1.03                           |
| Ethyl 9-hydroxy-10,12-octadecadienoic acid           | C20H36O3  | [M+H]+           | 324.27                | 0.02 | 1.32 | 65.82 $\pm$ 7.32                                        | 12.60 $\pm$ 0.32      | -2.39                          |
| Glycerol ester                                       |           |                  |                       |      |      |                                                         |                       |                                |
| 1- $\alpha$ -Linolenoyl-glycerol-3-O-glucoside       | C27H46O9  | [M+H]+           | 514.31                | 0.01 | 1.15 | 1.87 $\pm$ 1.86                                         | 107.28 $\pm$ 9.43     | 5.84                           |
| 2- $\alpha$ -Linolenoyl-glycerol-1-O-glucoside       | C27H46O9  | [M+H]+           | 514.31                | 0.03 | 1.02 | 3.47 $\pm$ 1.88                                         | 97.95 $\pm$ 16.41     | 4.82                           |
| Gingerglycolipid A                                   | C33H56O14 | [M-H]-           | 676.37                | 0.01 | 1.33 | 64.55 $\pm$ 3.07                                        | 354.52 $\pm$ 22.97    | 2.46                           |
| 2- $\alpha$ -Linolenoyl-glycerol-1,3-di-O-glucoside  | C33H56O14 | [M+H]+           | 676.37                | 0.01 | 1.32 | 13.93 $\pm$ 1.49                                        | 57.97 $\pm$ 4.46      | 2.06                           |
| 1- $\alpha$ -Linolenoyl-glycerol-2,3-di-O-glucoside  | C33H56O14 | [M+H]+           | 676.37                | 0.03 | 1.31 | 14.46 $\pm$ 0.17                                        | 48.59 $\pm$ 5.90      | 1.75                           |
| 1-Linoleoylglycerol-2,3-di-O-glucoside               | C33H58O14 | [M+H]+           | 678.38                | 0.00 | 1.32 | 31.43 $\pm$ 2.24                                        | 93.01 $\pm$ 3.01      | 1.57                           |
| 1-Oleoyl-sn-glycerol                                 | C21H40O4  | [M+H]+           | 356.29                | 0.03 | 1.28 | 96.16 $\pm$ 8.37                                        | 277.83 $\pm$ 35.46    | 1.53                           |
| 2-Linoleoylglycerol-1,3-di-O-glucoside               | C33H58O14 | [M+H]+           | 678.38                | 0.00 | 1.32 | 35.89 $\pm$ 2.63                                        | 94.38 $\pm$ 4.72      | 1.39                           |
| Gingerglycolipid B                                   | C33H58O14 | [M-H]-           | 678.38                | 0.00 | 1.32 | 246.58 $\pm$ 13.27                                      | 643.82 $\pm$ 30.20    | 1.38                           |

**Table S3.** Differentially changed carbohydrate metabolites without P affected by P treatments through metabolomics. The red number indicates the accumulation of compound was increased by 250P, while the green number shows that was decreased.

| Compounds                       | Formula   | Ionization model | Molecular weight (Da) | <i>P</i> | VIP  | Peak area $\times 10^3$<br>(Means $\pm$ Standard error) |                    | Log <sub>2</sub><br>(250P/0P) |
|---------------------------------|-----------|------------------|-----------------------|----------|------|---------------------------------------------------------|--------------------|-------------------------------|
|                                 |           |                  |                       |          |      | 0P                                                      | 250P               |                               |
| 1,6-Anhydro- $\beta$ -D-glucose | C6H10O5   | [M-H]-           | 162.05                | 0.01     | 1.34 | 0.01 $\pm$ 0.00                                         | 22.34 $\pm$ 2.62   | <b>11.28</b>                  |
| Maltotriose                     | C18H32O16 | [M+Na]+          | 504.17                | 0.00     | 1.32 | 105.34 $\pm$ 8.79                                       | 300.06 $\pm$ 2.17  | <b>1.51</b>                   |
| D-Xylonic acid                  | C5H10O6   | [M-H]-           | 166.05                | 0.01     | 1.31 | 862.55 $\pm$ 56.55                                      | 399.59 $\pm$ 20.22 | <b>-1.11</b>                  |
| Dmelezitose O-rhamnoside        | C24H42O20 | [M-H]-           | 650.23                | 0.00     | 1.30 | 948.60 $\pm$ 51.73                                      | 403.93 $\pm$ 33.31 | <b>-1.23</b>                  |

**Table S4.** Primer sequences.

| Gene names              | Primer sequences                                            |
|-------------------------|-------------------------------------------------------------|
| <i>CsPHO2</i>           | F: GTTGAGCACTGCCGTGATATTGC<br>R: CCCAAAGCCAAACCATCATAGTC    |
| <i>CsSPX1</i>           | F: AGAGGACTTTGTGTACTTGTTGGA<br>R: CTGTAATTCATCAAGAGCACCATTT |
| <i>CsSPX2</i>           | F: GGCTCCTCCGATGATGAATGG<br>R: ACCCATCTCCTCTTTGTAATCCA      |
| <i>CsSPX3/4</i>         | F: GCCTGCCAAGCGCCCTAG<br>R: CTTTATCATCTCTTCACTCCAATCT       |
| <i>CsPT1/2</i>          | F: GAGCAGCAGAAAGTAGACCAGATA<br>R: GCCCTTGCTATTCTAAAGACTTCAT |
| <i>CsTGY09G0002412b</i> | F: CTCTGCCTTCTCTGCTTTCATTAT<br>R: CGGTAGATTTAGAAGCAAGAGAGGT |
| <i>CsTGY01G0000352a</i> | F: GCTGCACTGATTGGTTCCAC<br>R: TTCTTCCCCTTCGCTCCAG           |
| <i>CsSnRK1</i>          | F: AAGAGATCACAAAGTTTCGAGGAC<br>R: TGCAGCCTCAAAGTGGAGT       |
| <i>CsSnRK2</i>          | F: GAAGCGCAGAAAAGTGGGCAC<br>R: CAAGATGACGATGATGACGCAG       |
| <i>CsSnRK3</i>          | F: AGTGATGCAGTCAAGATTTTATCCG<br>R: CCGAATGCCACTGCTCCGA      |
| <i>CsActin</i>          | F: GGCAGATAGATGCTTATGTAGGTG<br>R: TGTTTGCTTTAGGGTTGAGTGG    |

**Figure S1.** Phylogenetic trees of CsSPXs, CsPHOs and CsPTs. (A) SPXs. (B) PHOs. (C) PTs. At, arabidopsis; Os, rice; Gm, soybean. Red triangle indicates the key genes associated with P signal network in tea plant roots affected by P treatments.

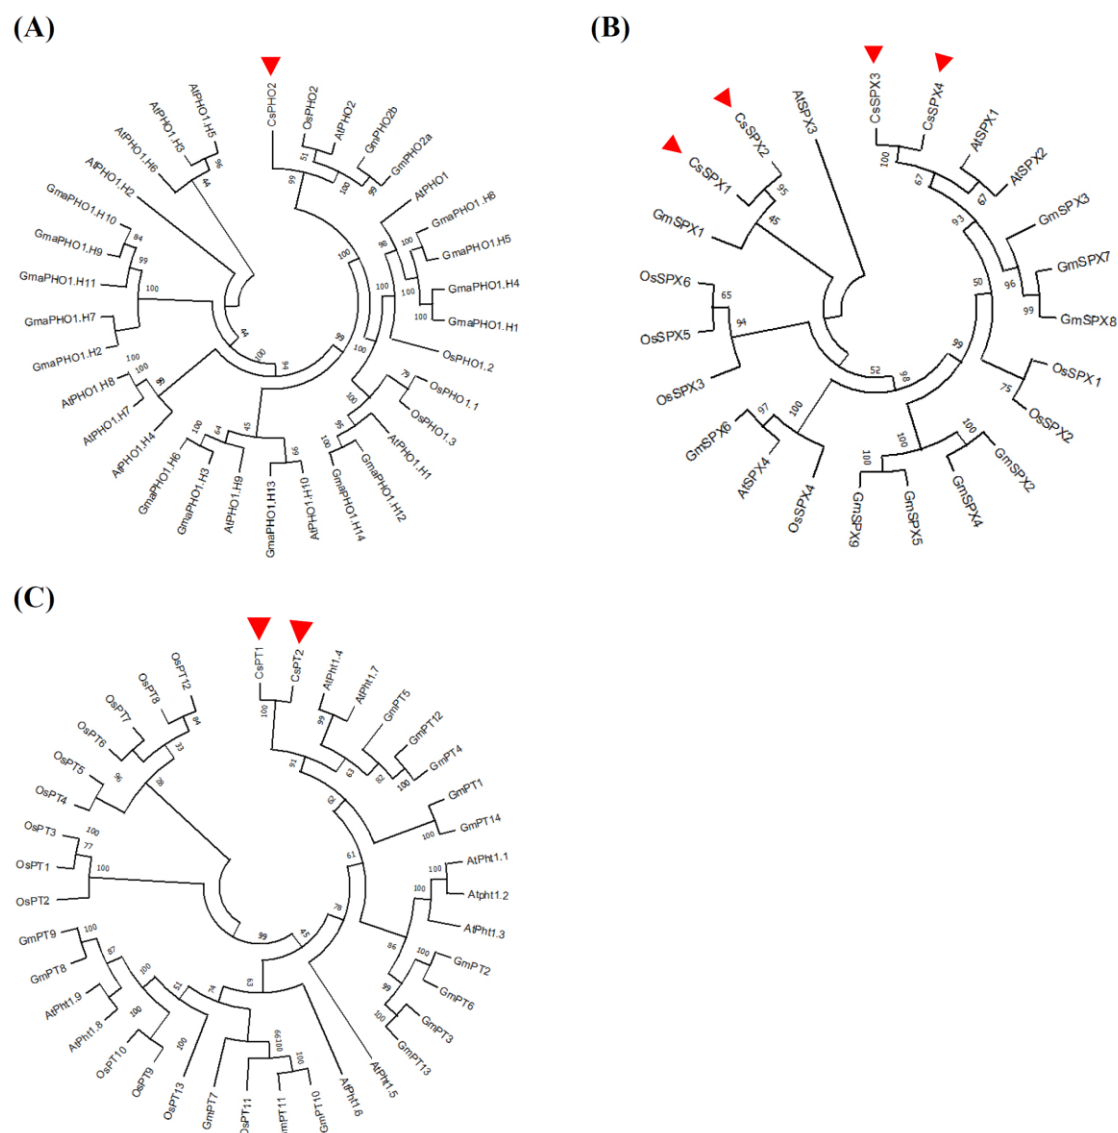

**Figure S2.** Relative expression of key genes in the roots of tea plants in response to P treatments. *Actin* was used as an internal standard. 0P, 0  $\mu\text{mol}\cdot\text{L}^{-1}$  P; 250P, 250  $\mu\text{mol}\cdot\text{L}^{-1}$  P. Three biological replicates were performed for each treatment. Asterisks indicate statistical differences. ns, no statistical differences; \*, significant differences at  $0.01 < P \leq 0.05$ ; \*\*, significant differences at  $0.001 < P \leq 0.01$ ; \*\*\*, significant differences at  $P \leq 0.001$ .

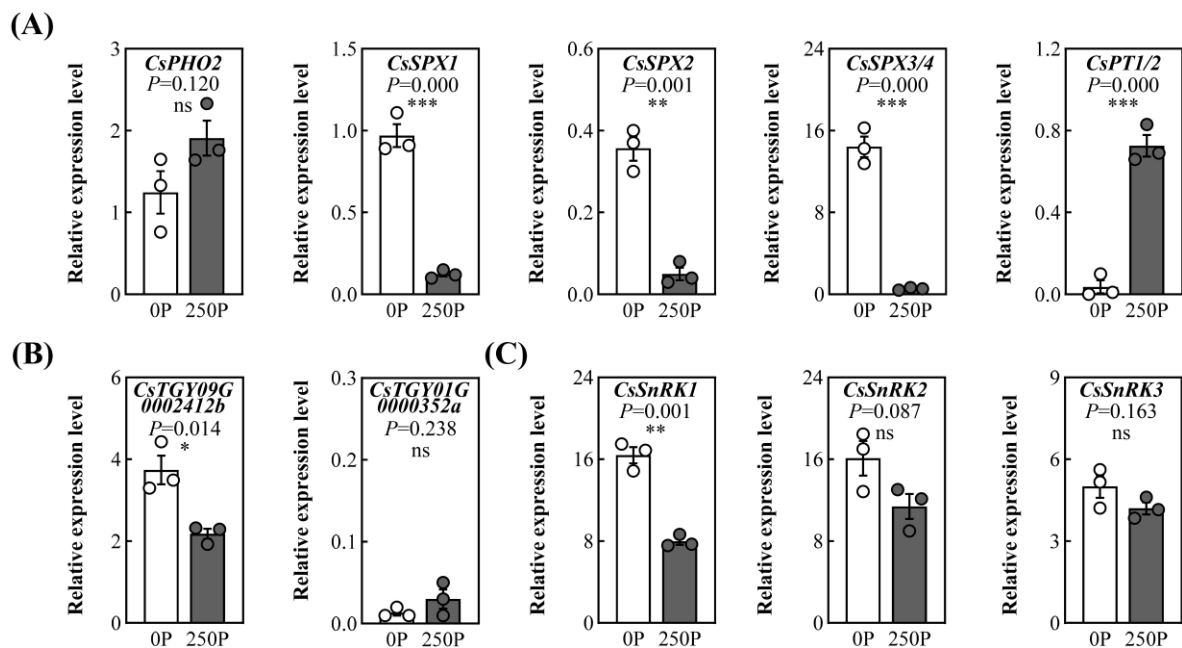

Supplement: s1 [file s1]
