# Supplementary material
Source: MDPI journal article supplement (https://www.mdpi.com/1422-0067/24/15/12431)
Supplement: s1 [file s1]

Archive with 1 entries (1 files):
- ijms-2483610-supplementary.pdf
